# Supplementary material
Source: PubMed Central journal article supplement (PMC6118119)
Supplement: NIHMS983257-supplement-SUPL.pdf [file NIHMS983257-supplement-SUPL.pdf]

# Supplemental Figure

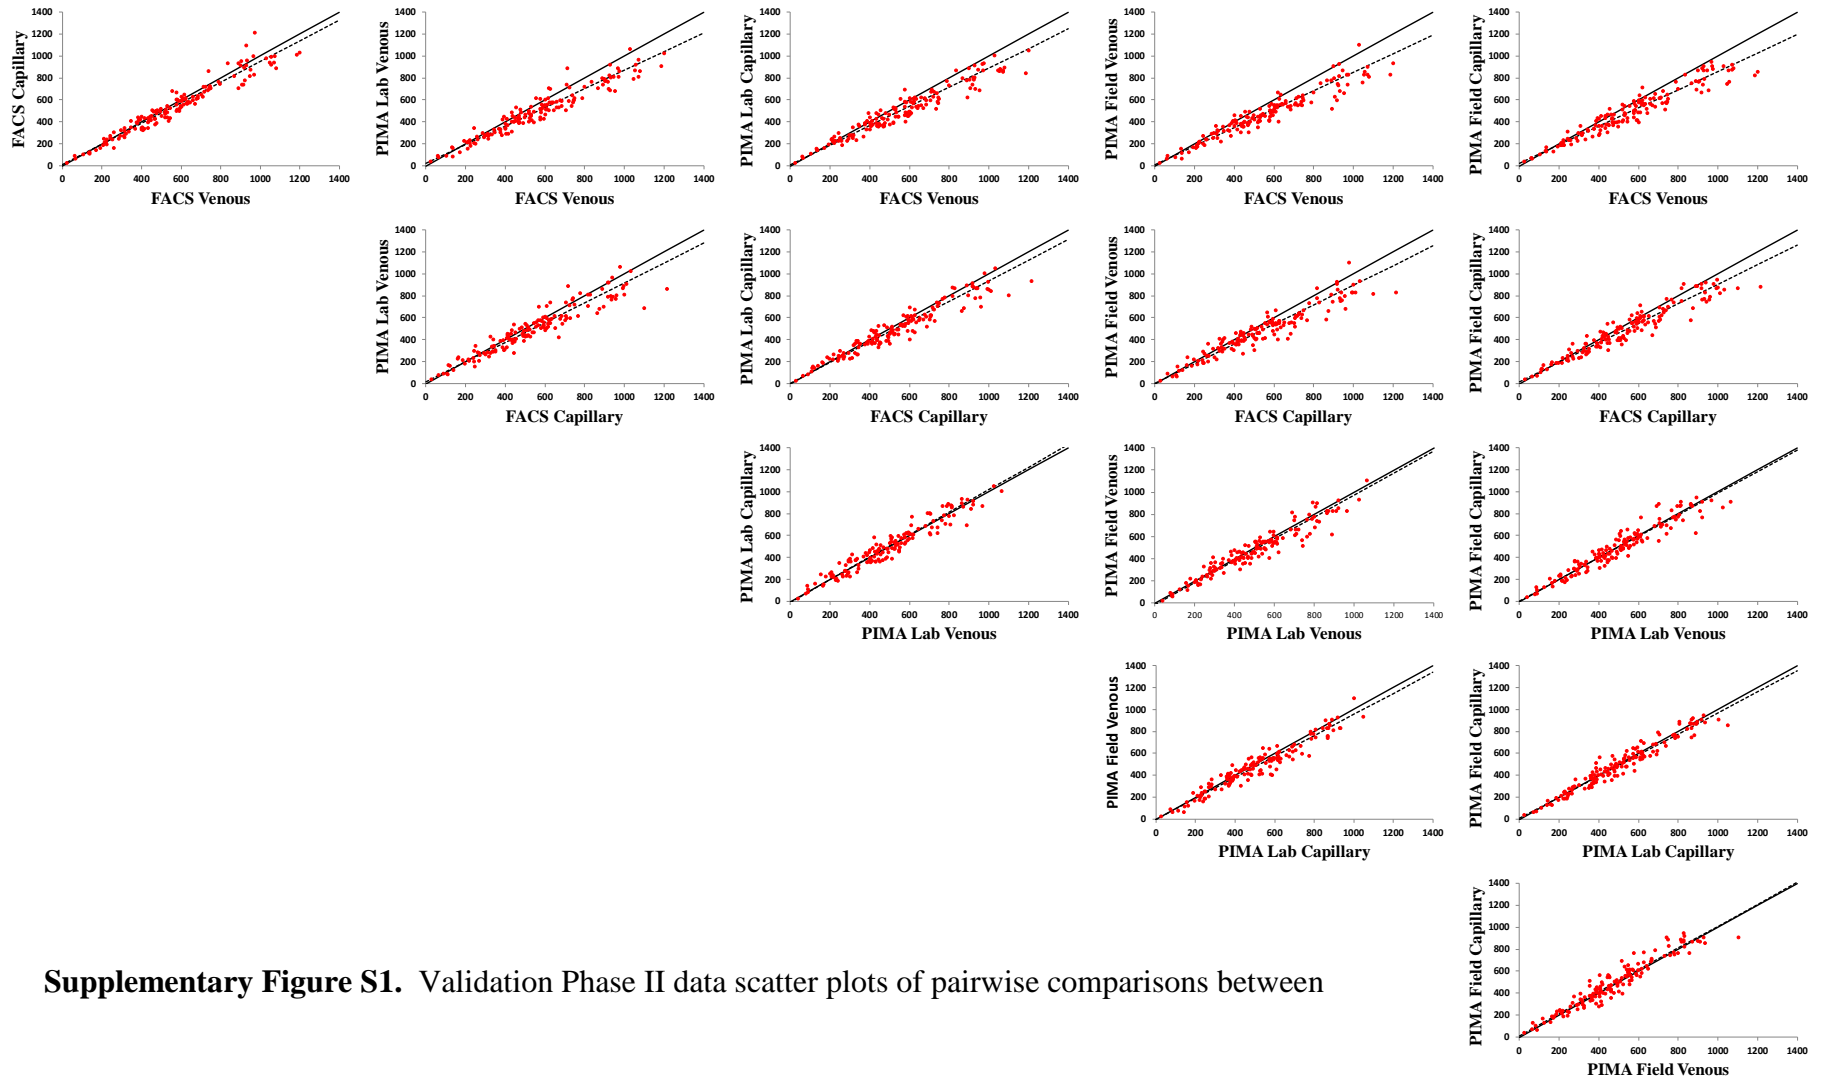

Supplementary Figure S1. Validation Phase II data scatter plots of pairwise comparisons between

FACSCalibur™ and Pima™ point-of-care devices for CD4 counts using venous and capillary blood draws in Western Kenya. The solid and dashed lines are the 45 degree reference line (perfect fit) and fitted lines from the linear regression model, respectively. Comparisons against the FACSCalibur™ venous CD4. All units in cells/  $\mu$ l.
